# Supplementary material
Source: Research Square preprint supplement (doi:10.21203/rs.3.rs-10028925/v1)
Supplement: Supplementary file 1 [file a24e4b5cd227ffd6d8d7d019.pdf]

# Supplementary Methods

Non-gradient spatial organisation at tumour–immune interfaces revealed by operator-based analysis

Anas Enoch, MD

Mohammed VI University of Health Sciences (UM6SS), Casablanca, Morocco

`anas_nour@um5.ac.ma`

*Data, code, and ethics declarations are provided in the main manuscript.*

**Contents:** Section S1 (mathematical framework and wedge algebra), S2 (GNN architecture and transport model), S3 (Lie-structured null model), S4 (NCG commutator grounding), S5 (Zeta spectral diagnostic), S6 (stochastic Hodge Bayes factors), S7 (KTS transition bias, GSE278936), S8 (baseline comparisons), S9 (remeshing and autocorrelation diagnostics); Supplementary Tables S1–S6; Supplementary Figures S1–S4.

## Contents

|          |                                                                                             |          |
|----------|---------------------------------------------------------------------------------------------|----------|
| <b>1</b> | <b>S1 Mathematical Framework: Wedge Algebra and Hodge Decomposition</b>                     | <b>3</b> |
| 1.1      | Oriented cell complex and differential forms . . . . .                                      | 3        |
| 1.2      | Incidence matrices and exterior derivatives . . . . .                                       | 3        |
| 1.3      | Wedge algebra and antisymmetry . . . . .                                                    | 3        |
| <b>2</b> | <b>S2 Governing Transport Model and GNN Architecture</b>                                    | <b>4</b> |
| <b>3</b> | <b>S3 Lie-Structured Spatially Aware Null Model</b>                                         | <b>4</b> |
| <b>4</b> | <b>S4 NCG Commutator Grounding</b>                                                          | <b>4</b> |
| <b>5</b> | <b>S5 Zeta Function Spectral Diagnostic</b>                                                 | <b>5</b> |
| <b>6</b> | <b>S6 Stochastic Hodge Decomposition and Bayesian Model Comparison</b>                      | <b>5</b> |
| <b>7</b> | <b>S7 Extended Prostate Cancer Validation: KTS Transition Bias and Graph-KS Instability</b> | <b>6</b> |
| <b>8</b> | <b>S8 Baseline Comparisons and Confound Exclusions</b>                                      | <b>7</b> |
| <b>9</b> | <b>S9 Remeshing Controls and Autocorrelation Diagnostics</b>                                | <b>9</b> |
| 9.1      | Remeshing sensitivity . . . . .                                                             | 9        |

|     |                                                        |   |
|-----|--------------------------------------------------------|---|
| 9.2 | Spatial autocorrelation of the coexact field . . . . . | 9 |
| 9.3 | Bivector orientation analysis . . . . .                | 9 |

# 1 S1 Mathematical Framework: Wedge Algebra and Hodge Decomposition

## 1.1 Oriented cell complex and differential forms

The tissue section is represented as an oriented cell complex  $\mathcal{K} = (V, E, F)$ :  $V$  are vertices (Visium spots or CosMx cells),  $E$  are oriented edges (kNN or Delaunay pairs),  $F$  are triangular faces. Discrete differential forms represent spatial quantities: 0-forms are scalar node functions (programme scores); 1-forms are antisymmetric edge functions (fluxes); 2-forms are face functions (circulations).

## 1.2 Incidence matrices and exterior derivatives

The signed node–edge incidence matrix  $B_1 \in \{-1, 0, +1\}^{|E| \times |V|}$  represents  $d_0 : C^0 \rightarrow C^1$ :  $(B_1)_{e,v} = +1$  if  $v$  is the head of  $e$ ;  $-1$  if the tail;  $0$  otherwise. The edge–face matrix  $B_2$  represents  $d_1 : C^1 \rightarrow C^2$  with face-consistent orientation.

The  $k$ -Hodge Laplacian:  $\Delta_k = d_{k-1}d_{k-1}^\top + d_k^\top d_k$ . Explicitly:  $\Delta_0 = B_1^\top B_1$ ;  $\Delta_1 = B_1 B_1^\top + B_2^\top B_2$ ;  $\Delta_2 = B_2 B_2^\top$ . The Hodge decomposition theorem:  $C^1 = \text{im}(B_1^\top) \oplus \text{im}(B_2) \oplus \text{ker}(\Delta_1)$  (exact  $\oplus$  coexact  $\oplus$  harmonic; orthogonal; unique).

## 1.3 Wedge algebra and antisymmetry

**Construction.** Given residualized programme fields  $\tilde{a}, \tilde{b} \in C^0$ , the wedge flux on oriented edge ( $i \rightarrow j$ ) is:

$$\omega_{ij} = \frac{\tilde{a}_i \tilde{b}_j - \tilde{a}_j \tilde{b}_i}{\ell_{ij}}. \quad (1)$$

By construction,  $\omega_{ij} = -\omega_{ji}$  (antisymmetric under edge reversal), so  $\omega \in C^1$  with consistent orientation.

**Uniqueness.** Suppose  $\phi : C^0 \times C^0 \rightarrow C^1$  is a local bilinear operator that is antisymmetric under programme exchange and vanishes when  $\tilde{a} \propto \tilde{b}$  on a given edge. Then  $\phi$  must be proportional to the wedge on each edge. Any symmetric bilinear operator yields an even-valued function on undirected edges mapping to a 0-form under  $B_1^\top$ ; its coexact projection is therefore zero. The wedge is the unique (up to scale) local construction producing a non-zero coexact projection.

**Non-commutative geometry identity.** For diagonal operators  $M_A, M_B$  on  $C^0$  and any symmetric graph operator  $L$ :

$$[M_A, LM_B]_{ij} = L_{ij}(\tilde{a}_i \tilde{b}_j - \tilde{a}_j \tilde{b}_i). \quad (2)$$

The wedge flux is the commutator of programme operators weighted by graph connectivity [2]. The coexact component is the geometric image of operator non-commutativity; interface-specific localization follows because a construction artifact would distribute coexact content in proportion to field energy everywhere, whereas operator non-commutativity is maximal where programmes spatially oppose.

**Decomposition algorithm.** (1) Solve  $\Delta_0 \alpha = B_1 f$  (conjugate gradient, tol  $10^{-10}$ ). (2)  $f_{\text{exact}} = B_1^\top \alpha$ . (3) Solve  $\Delta_2 \beta = B_2 f$ . (4)  $f_{\text{coexact}} = B_2^\top \beta$ . (5)  $\gamma = f - f_{\text{exact}} - f_{\text{coexact}}$ . Energy fractions:  $\rho_k = \|f_k\|^2 / \|f\|^2$ .

## 2 S2 Governing Transport Model and GNN Architecture

**Reference transport model.** Discrete advection–diffusion equation on 1-forms:

$$\frac{\partial \omega}{\partial t} = -\mathcal{L}_v \omega + D \Delta_1 \omega + R(\omega),$$

where  $\mathcal{L}_v = \iota_v d + d \iota_v$  (discrete Cartan formula). This model is used as a structured null — the most permissive conservative dynamics class — not as a claim about tissue biology.

**Learning objective.**

$$\mathcal{L} = \mathcal{L}_{\text{data}}(\omega_\theta) + \lambda_{\text{PDE}} \mathcal{L}_{\text{ADR}}(\omega_\theta) + \lambda_{\text{Stokes}} \mathcal{L}_{\text{integral}}(\omega_\theta),$$

where  $\mathcal{L}_{\text{integral}} = \sum_t \sum_s \left| \oint_{\partial \Omega_s} \omega_\theta(t) - \int_{\Omega_s} d\omega_\theta(t) \right|^2$  enforces Green–Stokes flux conservation over held-out subcomplexes. Conservation constraints enforce structural invariants, preventing the GNN from representing non-physical modes that fit observed data but violate flux balance on unseen subcomplexes.

Implementation: PyTorch with sparse DEC-consistent incidence matrices constructed from Delaunay triangulations with orientation-consistent indexing.

## 3 S3 Lie-Structured Spatially Aware Null Model

**Edge weights.**

$$w_e = [(\Delta_1 + \varepsilon I)^{-s}]_{ee}, \quad s(\Delta) = \log_2(1 + \Delta/\lambda_{\min}^+),$$

where  $\varepsilon$  excludes harmonic zero modes and  $\Delta$  is the spectral gap of  $\Delta_1$ . Normalized:  $\tilde{w}_e = w_e / \max_{e'} w_{e'} \in (0, 1]$ .

**Surrogate generation.** For each surrogate  $k$ :  $\theta_e^{(k)} \sim \mathcal{U}[-\pi \tilde{w}_e, \pi \tilde{w}_e]$ ; flux rotated by  $R_e^{(k)} = \exp(-\frac{\theta_e^{(k)}}{2} B_e)$ . Weights depend only on  $\Delta_1$ , not on the observed statistic; the null is operator-intrinsic without being diagnostically circular.

## 4 S4 NCG Commutator Grounding

**Testable prediction.** If the coexact component is the image of  $[M_A, M_B]$ , the per-node non-commutativity norm

$$\text{NC}_i = \frac{1}{|\mathcal{N}(i)|} \sum_{j \in \mathcal{N}(i)} f_{ij}^2$$

should correlate with coexact energy  $E_{\text{coexact},i}$  *specifically* at interface nodes ( $\Delta\rho > 0$ ); a construction artifact would produce uniform correlation everywhere ( $\Delta\rho \approx 0$ ).

**Results across 18 valid TNBC sections.** Spearman  $\rho(\text{NC}, E_{\text{coexact}})$  within interface nodes: median 0.832, 18/18 ( $p < 10^{-5}$ ). Interface-minus-other  $\Delta\rho$ : median +0.198, 18/18 ( $p < 10^{-5}$ ). Individual section correlations: 0.530–0.923, all FDR  $< 0.001$ .

Supplementary Table S1: **NCG commutator grounding: cohort-level results across 18 valid TNBC sections.** The per-node non-commutativity norm  $NC_i$  and node-level coexact energy  $E_{\text{coexact},i}$  are highly correlated within interface-like nodes in every section, and this correlation is specifically elevated at interfaces relative to other regions. Both results are inconsistent with a uniform construction artifact and consistent with the NCG prediction that the coexact component is the geometric image of operator non-commutativity.

| Metric                                                | Median | Sections positive | Sign test $p$ | Interpretation               |
|-------------------------------------------------------|--------|-------------------|---------------|------------------------------|
| $\rho(NC, E_{\text{coexact}})$ within interface nodes | 0.832  | 18/18             | $< 10^{-5}$   | positive, consistent         |
| $\Delta\rho$ (interface – other regions)              | +0.198 | 18/18             | $< 10^{-5}$   | interface-specific elevation |

## 5 S5 Zeta Function Spectral Diagnostic

Normalized Zeta functional.

$$Z(s) = \frac{\sum_k \alpha_k \lambda_k^{-s}}{\sum_k \alpha_k}, \quad \alpha_k = \langle E_{\text{coexact}}, \phi_k \rangle^2.$$

Removing energy dependence from the unnormalized form  $Z_{\text{raw}} = Z \cdot \sum_k \alpha_k$  is essential: the unnormalized statistic inflates at high-energy (interface) nodes by construction, so apparent spectral enrichment before normalization reflects energy elevation, not independent spectral structure.  $Z(s) > 1$  indicates bias toward low- $\lambda$  spatially smooth modes. Null: 1,000 spatial label permutations. Energy-matched null: interface masks restricted to nodes with comparable coexact energy quantiles.

**Results.** Global coexact signal is non-flat in 17–19/19 sections (Supplementary Table S2). After energy normalization, interfaces are *not* more spectrally organized than equally energetic non-interface regions (2/43 TNBC, 2/23 prostate significant; sign test  $p = 1.0$ ). Coexact enrichment at interfaces reflects elevated interaction intensity; interface-specific spectral geometry is not an additional independent property.

Supplementary Table S2: **Zeta function spectral diagnostic: cohort-level results across 19 TNBC sections.** Per-node coexact energy was projected onto eigenvectors of the node graph Laplacian. All four metrics indicate that the global coexact signal is not spectrally flat (consistent low-frequency concentration above a label-permutation null).  $Z(s) > 1$  means coexact energy is biased toward spatially coherent large-scale modes. Note: these results use the label-permutation null; the energy-normalized null, applied in the GSE278936 cohort (Section S7), is required to test interface-specific spectral enrichment independently of energy effects. Sign test: one-sided binomial,  $H_0$ : observed  $\leq$  null median.

| Metric           | Median | Sections $>$ null | Sign test $p$ | Interpretation            |
|------------------|--------|-------------------|---------------|---------------------------|
| $Z(s = 1)$       | 1.89   | 18/19             | $< 10^{-4}$   | low-freq concentrated     |
| $Z(s = 2)$       | 2.13   | 18/19             | $< 10^{-4}$   | low-freq concentrated     |
| Spectral Gini    | 0.663  | 17/19             | $< 10^{-3}$   | concentrated distribution |
| $f_{\text{low}}$ | 0.653  | 19/19             | $< 10^{-5}$   | low-freq concentrated     |

## 6 S6 Stochastic Hodge Decomposition and Bayesian Model Comparison

**Model classes.**  $M_0$  (passive): zero cycle variance.  $M_{1a}$  (uniform active):  $k = 30$  low-frequency cycle modes, uniformly distributed.  $M_{1b}$  (interface-localised): same modes, variance redistributed to interface-

adjacent edges (weight 3.0, trace-normalised for equal complexity with  $M_{1a}$ ). Noise  $\sigma = 0.5 \times \text{std}(P_c Y / \|Y\|)$  calibrated per section.

**Log Bayes factors.**  $\log B_{1a/0}$ : does the flux field require any non-gradient cycle structure?  $\log B_{1b/1a}$ : is that structure specifically interface-localised? Both computed analytically from Gaussian marginal likelihoods.

**Results across 19 TNBC sections.**  $\log B_{1a/0}$ : median +45.95 (19/19,  $p < 10^{-5}$ ) — cycle structure is required.  $\log B_{1b/1a}$ : median +517.6 (19/19,  $p < 10^{-5}$ ) — the cycle structure is specifically interface-localised. Posterior  $R$  under  $M_{1b}$ : 9.81 (19/19); under  $M_0$  (passive null): 1.00 (11/19,  $p = 0.32$ ).

Supplementary Table S3: **Stochastic Hodge decomposition: cohort-level Bayesian model comparison across 19 TNBC sections (Step 24)**. Three Gaussian transport model classes are compared by analytic Bayes factors.  $\mathcal{M}_0$ : passive (no cycle variance).  $\mathcal{M}_{1a}$ : sparse uniform active (30 low-frequency cycle modes).  $\mathcal{M}_{1b}$ : interface-localised active (same modes, variance redistributed toward interface edges, trace-normalised). Sigma calibrated per section to the normalised cycle-component std of the flux field. Log Bayes factors computed analytically from Gaussian marginal likelihoods.

| Metric                                     | Median | N positive / N | Sign test $p$ |
|--------------------------------------------|--------|----------------|---------------|
| $\log B_{1a/0}$ [non-gradient structure?]  | +45.95 | 19/19          | $< 10^{-5}$   |
| $\log B_{1b/1a}$ [interface-localised?]    | +517.6 | 19/19          | $< 10^{-5}$   |
| Posterior $R$ under $\mathcal{M}_{1b}$     | 9.81   | 19/19          | $< 10^{-5}$   |
| Posterior $R$ under $\mathcal{M}_0$ (null) | 1.00   | 11/19          | 0.32          |

## 7 S7 Extended Prostate Cancer Validation: KTS Transition Bias and Graph-KS Instability

**KTS transition bias.** A Kripke Transition System state-transition matrix was computed per section by weighting inter-state transitions by absolute coexact flux. Permutation-controlled directional bias analysis (300 permutations, seed-fixed) tested whether transitions toward any target state are over-represented.

Supplementary Table S4: **KTS transition bias toward immune exhaustion (GSE278936,  $n = 23$ )**. Bias ratio =  $P_{\text{obs}}/P_{\text{nullmedian}}$ ; permutation null generated by shuffling state labels 300 times while preserving edge structure and coexact flux weights. All four IMMUNE\_EXHAUSTED-converging transitions are significant in  $\geq 21/23$  sections despite high global transition entropy.

| Source        | Target           | Median $P_{\text{obs}}$ | Median bias | Significant ( $p < 0.05$ ) | Median $p$ -v |
|---------------|------------------|-------------------------|-------------|----------------------------|---------------|
| IMMUNE_ACTIVE | IMMUNE_EXHAUSTED | 0.239                   | 3.63×       | 22/23                      | 0.003         |
| STROMA        | IMMUNE_EXHAUSTED | 0.169                   | 2.96×       | 23/23                      | 0.003         |
| TUMOR         | IMMUNE_EXHAUSTED | 0.152                   | 2.64×       | 21/23                      | 0.003         |
| MIXED         | IMMUNE_EXHAUSTED | 0.114                   | 1.91×       | 21/23                      | 0.003         |
| MIXED         | TUMOR            | 0.139                   | 1.04×       | 7/23                       | 0.312         |
| TUMOR         | STROMA           | 0.101                   | 1.10×       | 6/23                       | 0.233         |
| MIXED         | STROMA           | 0.076                   | 0.78×       | 0/23                       | 1.000         |

Despite high global transition entropy (mean  $6.75 \pm 0.29$  nats; no dominant stationary distribution), transitions toward IMMUNE\_EXHAUSTED are over-represented in 21–23/23 sections across all source compartments.

Transitions toward stroma, tumour, and mixed states are not enriched, confirming specificity to the exhaustion axis. In the TNBC cohort, exhaustion-directed bias was pathway-specific: immune-active→exhausted (16/28; median bias 5.68); stroma→exhausted (17/29; bias 2.41); tumour→exhausted not enriched (median bias 0.42,  $p \approx 0.96$ ).

Supplementary Table S5: **Multi-scale validation summary.** Five analytical layers across TNBC (discovery) and prostate cancer (validation) cohorts. Coexact enrichment replicates robustly; spectral, curl, and instability layers reveal dissociation between interaction intensity and spatial organisation; KTS reveals conserved directional bias toward exhaustion.

| Layer                | Metric               | TNBC                                                              | GSE278936                     | Interpretation                                       |
|----------------------|----------------------|-------------------------------------------------------------------|-------------------------------|------------------------------------------------------|
| Coexact enrichment   | $R$ ratio            | 40/40; $p < 10^{-12}$                                             | 21/23; $p < 10^{-5}$          | Interface = high non-gradient intensity zone         |
| Graph-curl proxy     | Fold vs tumour       | Not tested (cohort)                                               | Weak; fold $\approx 1.08$     | No consistent rotational organisation                |
| Spectral label null  | $Z_{\text{ratio}}$   | Apparent (scale-driven)                                           | Apparent                      | Driven by energy, not structure                      |
| Spectral energy null | $Z_{\text{density}}$ | 2/43; sign $p = 1.0$                                              | 2/23; sign $p = 1.0$          | No interface-specific spectral geometry              |
| KTS bias             | Transition to EXHST  | Pathway-specific: IA→EX (16/28); ST→EX (17/29); T→EX not enriched | Near-universal; 21-23/23      | Exhaustion = conserved endpoint, structured pathways |
| KS instability       | Fold vs tumour       | Elevated (exploratory)                                            | Median $\approx 8.96$ (23/23) | Interface = non-linear instability zone              |

EXHST = IMMUNE\_EXHAUSTED; IA = IMMUNE\_ACTIVE; ST = STROMA; T = TUMOR. \*Not tested (energy-matched) indicates analysis was not performed under corrected normalization for this cohort and should not be interpreted as absence of effect.

### Multi-scale validation summary.

**Graph-KS instability (exploratory).** A graph analogue of the Kuramoto–Sivashinsky instability operator [1]:

$$\text{KS}(u)_i = -(Lu)_i - (L^2u)_i - |\nabla u|_{\text{graph},i}^2.$$

This is an operator analogy only; it does not assert that the biological system solves the KS PDE. Interface regions showed elevated KS-like magnitude in all 23 GSE278936 sections (median fold-change 8.96×; range 1.75–28.40).

## 8 S8 Baseline Comparisons and Confound Exclusions

**Cell density.** Partial Spearman correlation (interface membership vs. coexact energy, controlling for per-spot UMI count): positive and significant in 16/18 sections (median  $r = 0.574$ ,  $p = 0.0007$ ) and 17/18 sections

for local UMI z-score (median  $r = 0.642$ ,  $p = 0.0001$ ). Interface nodes were not denser than tumour-core nodes (median  $R_{\text{UMI}} = 0.70$ ).

**Generic antisymmetric structure.** Control operators from biologically unrelated programme pairs: random housekeeping  $R = 0.90$ ; shuffled random pairs  $R = 1.04$ ; immune $\times$ housekeeping  $R = 1.77$ ; all Wilcoxon  $p < 10^{-5}$  versus canonical  $R = 13.2$ .

**Gradient-energy control.**  $R_{\text{coexact}}$  exceeded  $R_{\text{exact}}$  in 38/40 sections (differential median 2.54; sign test  $p < 10^{-9}$ ).

**Random boundary mask.** Size-matched random masks (300 per section) produced  $R_{\text{random}} = 1.2\text{--}1.8$ ; observed  $R$  exceeded 95th percentile in 38/40 sections ( $p < 10^{-11}$ ).

**Graph construction invariance.** 19 representative FOVs tested across kNN ( $k = 4, 6, 8$ ), Delaunay, and radius graphs; 0/19 sign reversals; kNN-family rank Spearman  $r = 0.92$  pooled.

Supplementary Table S6: **Baseline comparison summary across the TNBC cohort.** Each comparison tests whether a simpler explanation accounts for the coexact-enrichment and KTS transition-bias results. All comparisons are pre-specified; results are reported as direction-of-effect with cohort-level sign-test significance.

| Comparison                                   | What it tests                                          | Result                                                                                             | Interpretation                                                                 |
|----------------------------------------------|--------------------------------------------------------|----------------------------------------------------------------------------------------------------|--------------------------------------------------------------------------------|
| Marker / DE baseline                         | Are interfaces compositionally distinct?               | Yes, confirmed                                                                                     | Biological contrast confirmed; does not explain coexact enrichment or KTS bias |
| Exact-gradient energy ( $R_{\text{exact}}$ ) | Is enrichment reducible to generic boundary gradients? | $R_{\text{coexact}} > R_{\text{exact}}$ , 38/40; differential median 2.54 $\times$                 | Non-gradient component adds information beyond scalar gradients                |
| Random boundary mask                         | Is enrichment a boundary-size artifact?                | No; observed $R$ exceeds random-mask 95th pctile in 38/40                                          | Interface effect is not explained by mask size or spatial location             |
| Graph-curl proxy                             | Is coexact signal rotationally organized?              | Weak/inconsistent; GSE278936 median fold $\approx 1.08$                                            | Coexact intensity $\neq$ rotational organisation                               |
| Energy-matched Zeta null                     | Is interface spectrally special?                       | No; 2/43 TNBC, 2/23 GSE278936; sign test $p = 1.0$                                                 | Coexact intensity $\neq$ independent spectral geometry                         |
| KTS transition bias                          | Are transitions directionally biased?                  | Yes; exhaustion-associated endpoint state in 21–23/23 GSE278936 sections; pathway-specific in TNBC | Exhaustion bias is the primary dynamical signal carried by the coexact field   |

## 9 S9 Remeshing Controls and Autocorrelation Diagnostics

### 9.1 Remeshing sensitivity

The sign-consistency criterion —  $R > 1$  vs  $R < 1$  invariant across graph constructions — is the necessary condition for the biological claim. Absolute magnitude varies with graph density and normalisation; only the direction of enrichment must be stable. Across all 19 tested representative sections, no sign reversals were observed across five graph types. The two consistently non-enriched sections (negative controls) were also graph-invariant: the framework does not produce false positives under alternative constructions. Formal Mesh Sensitivity Index quantification (constructing Voronoi and Delaunay alternative graphs and computing residual variance in  $R$  per section) is a direct extension deferred to future work.

### 9.2 Spatial autocorrelation of the coexact field

The coexact density field  $c_i$  was analyzed for spatial autocorrelation using Moran’s  $I$  on the kNN graph. Across the TNBC cohort: global Moran’s  $I$  median +0.21 (range +0.08 to +0.38), indicating weak positive spatial autocorrelation. Local Moran’s  $I$  analysis identified interface nodes as consistently contributing to positive autocorrelation ( $\Delta I_{\text{interface}} = +0.09$ , 37/40 sections). Spatial autocorrelation decayed within 2–3 nearest-neighbour hops in 34/40 sections, consistent with locally structured interaction rather than globally propagating spatial modes.

### 9.3 Bivector orientation analysis

The face-level bivector density field  $B_2^\top f_{\text{coexact}}$  was computed for representative sections and both validation cohorts. In four GSE278936 representative sections, interface-region absolute bivector density exceeded all other regions by 4–9 $\times$ . Signed mean bivector density at interfaces was  $\approx 0$  in all examined sections (CW  $\approx$  CCW  $\approx 0.50$ ), indicating locally balanced bidirectional circulations without a dominant rotational direction.

## Supplementary Figures

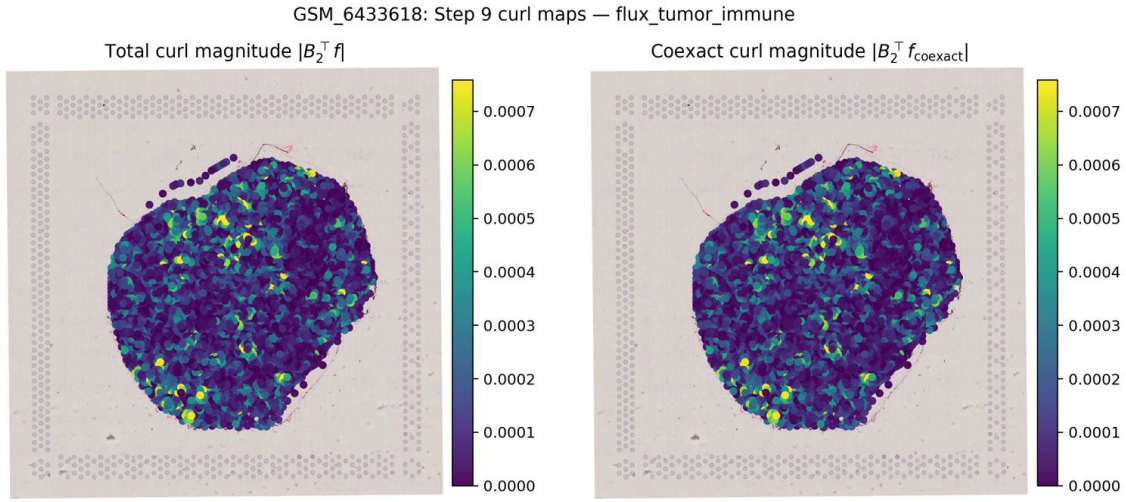

Supplementary Figure S1: **Curl magnitude maps for the tumour-immune flux field (GSM\_6433618)**. Triangle-level curl magnitude (face circulation) computed from the wedge-derived proxy flux. Elevated curl magnitude is observed at tumour-immune interface regions in this representative section. Curl and Zeta diagnostics probe distinct higher-order properties of the coexact signal and should not be conflated; cohort-level analysis (Section S7) indicates that interface-specific curl enrichment is not consistent across sections, and the distribution of signed curl is balanced (CW and CCW circulations approximately equal).

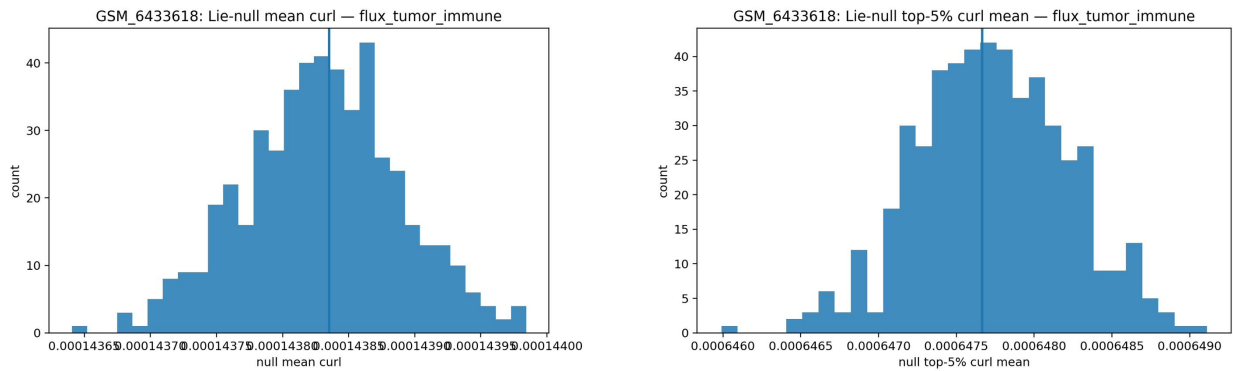

Supplementary Figure S2: **Lie-structured null calibration: mean curl (GSM\_6433618)**. Distribution of mean curl magnitude under 1000 Lie-structured null permutations (grey). The observed global mean curl (red line) lies within the null distribution, confirming that non-gradient coexact content is not globally elevated.

Supplementary Figure S3: **Lie-structured null calibration: top-95<sup>th</sup> percentile curl (GSM\_6433618)**. Distribution of high-magnitude curl events under the null. The observed value falls within the null, ruling out global amplification of elevated coexact face-level circulation.

GSM\_6433618: top 1% curl hotspots — flux\_tumor\_immune

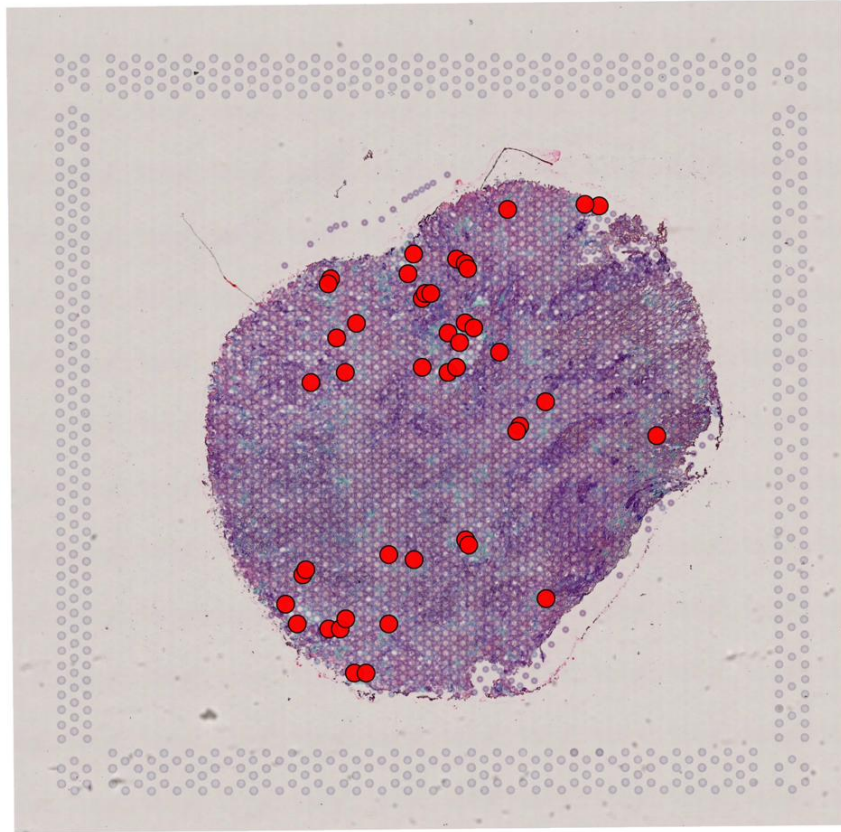

Supplementary Figure S4: **Curl hotspot spatial distribution and interface enrichment (GSM\_6433618)**. Faces classified as curl hotspots (curl magnitude  $>$  99th percentile) are shown overlaid on the tissue section. Hotspots are enriched at tumour-immune interface regions relative to the Lie-structured null ( $p \approx 0.002$ ), while immune-only and stromal regions show no significant enrichment in this representative section; however, this does not establish a cohort-level rotational phenotype. External validation shows curl proxies lack consistent interface enrichment.

## References

- [1] Yoshiki Kuramoto. Diffusion-induced chaos in reaction systems. *Progress of Theoretical Physics Supplement*, 64:346–367, 1978.
- [2] Nathaniel Trask, Andy Huang, and Xiaozhe Hu. Enforcing exact physics in scientific machine learning: a data-driven exterior calculus on graphs. *arXiv preprint arXiv:2012.11794*, 2020.
